# Supplementary material for: A Cautionary Note on the Use of Split-YFP/BiFC in Plant Protein-Protein Interaction Studies
Source: Int J Mol Sci. 2014 May 30;15(6):9628–43. doi: 10.3390/ijms15069628 (PMC4100113; doi:10.3390/ijms15069628)
Supplement: Supplementary File 1 — Supplementary Table (XLSX, 23 KB) [file ijms-15-09628-s001.xlsx]

## Sheet: Sheet1
Table S1: Inventory of published studies in which the BiFC/Split-YFP method is used. The top 100 publications were retrieved using a PUBMED search for "BiFC and plant" (period 2006-2014).
Only papers in which BiFC is used as tool have been analysed and reviews have not been taken into account.
Vectors 1)	Detection method 2)	control(s) 3)	Reference	Comments
pSPYNE (154) and pUC-SPYCE	fluorescence microscopy, qualitative	combinations with empty vectors	PMID: 24548087
pSITE-nEGFP-C1 and pSITE-cEGFP-C1	fluorescence microscopy, qualitative	transfections with single plasmids	PMID: 24505423
pSAT4-DEST-nEYFP-C1 and pSAT5-DEST-cEYFP-C1	fluorescence microscopy, qualitative	none or not clearly indicated	PMID: 24463502
35S-SPYNE(R)173 and 35S-SPYCE(M)	fluorescence microscopy, qualitative	combinations with empty vectors	PMID: 24397480
35S-SPYNE(R)173 and 35S-SPYCE(M)	Quantitative based on counting number of positive cells	none or not clearly indicated	PMID: 24284066
35S-SPYNE(R)173 and 35S-SPYCE(M)	fluorescence microscopy, qualitative	combinations with empty vectors	PMID: 24215658
(pSAT1-N) and(pSAT1-C)	fluorescence microscopy, qualitative	combinations with empty vectors	PMID: 24142379
pSPYNE (154) and pUC-SPYCE	fluorescence microscopy, qualitative	combinations with empty vectors	PMID: 24118612
pSPYNE (154) and pUC-SPYCE	fluorescence microscopy, qualitative	combinations with empty vectors	PMID: 24055423
pEarleyGate201-YN(1–174 aa) and pEarleyGate202-YC (175–239 aa)	fluorescence microscopy, qualitative	combinations with empty vectors	PMID: 24033823
35SMCS-cYFP(155-239) + 35SMCS-nYFP(1-154)	fluorescence microscopy, qualitative	combinations with empty vectors	PMID: 23974356
pSPYNE (154) and pUC-SPYCE	fluorescence microscopy, qualitative	transfections with single plasmids	PMID: 23964902
35S-SPYNE(R)173 and 35S-SPYCE(M)	fluorescence microscopy, qualitative	none or not clearly indicated	PMID: 23760157
35S-SPYNE(R)173 and 35S-SPYCE(M)	fluorescence microscopy, qualitative	combinations with empty vectors	PMID: 23758924
pEarleyGate201-YN(1–174 aa) and pEarleyGate202-YC (175–239 aa)	fluorescence microscopy, qualitative	combinations with empty vectors	PMID: 23750279
pDH51-GW-YFPn (1-156) and pDH51-GW-YFPc	fluorescence microscopy, qualitative	none or not clearly indicated	PMID: 23732981
p2YN–35S (1-158) and p2YC–35S	fluorescence microscopy, qualitative	combinations with empty vectors	PMID: 23702595
pSPYNE (154) and pUC-SPYCE	fluorescence microscopy, qualitative	combinations with empty vectors	PMID: 23648486
pSPYNE (154) and pUC-SPYCE	fluorescence microscopy, qualitative	combinations with empty vectors	PMID: 23634807
pSAT4A-nEYFP-N1	fluorescence microscopy, qualitative	combinations with empty vectors	PMID: 23505421
Gateway compatible pY736 and pY735 vectors	fluorescence microscopy, qualitative	combinations with empty vectors	PMID: 23496930
pCV-nYFP-C and pCV-cYFP-C	fluorescence microscopy, qualitative	combinations with empty vectors	PMID: 23474918
NYFP (1–154 aa) and CYFP (155–238 aa)	fluorescence microscopy, qualitative	Interaction test for point-mutated or truncated version of protein of interest	PMID: 23463175
pSPYNE (154) and pUC-SPYCE	fluorescence microscopy, qualitative	Interaction test for point-mutated or truncated version of protein of interest	PMID: 23437825
pEarleyGate201-YN(1–174 aa) and pEarleyGate202-YC (175–239 aa)	fluorescence microscopy, qualitative	none or not clearly indicated	PMID: 23437216
35S-SPYNE(R)173 and 35S-SPYCE(M)	fluorescence microscopy, qualitative	Interaction test for point-mutated or truncated version of protein of interest	PMID: 23386854
pEarleyGate201-YN(1–174 aa) and pEarleyGate202-YC (175–239 aa)	fluorescence microscopy, qualitative	combinations with empty vectors	PMID: 23365455
35S-SPYNE(R)173 and 35S-SPYCE(M)	fluorescence microscopy, qualitative	Interaction test for related proteins with similar characteristics/cellular localisation	PMID: 23331977
pYFP-N (1–155) and pYFP-C (156–239)	fluorescence microscopy, qualitative	combinations with empty vectors	PMID: 23314496
pSPYNE (154) and pUC-SPYCE	fluorescence microscopy, qualitative	none or not clearly indicated	PMID: 23274393
35S-SPYNE(R)173 and 35S-SPYCE(M)	fluorescence microscopy, qualitative	Interaction test with unrelated protein(s)	PMID: 23253553
YFP_N-terminus (VN154) and the C-terminus (VC80)	fluorescence microscopy, qualitative	none or not clearly indicated	PMID: 23166612
pSPYNE (154) and pUC-SPYCE	fluorescence microscopy, qualitative	combinations with empty vectors	PMID: 23105131
pSPYNE (154) and pUC-SPYCE	fluorescence microscopy, qualitative	none or not clearly indicated	PMID: 23065282
pYFN43 and pYFC43	fluorescence microscopy, qualitative	Interaction test with unrelated protein(s)	PMID: 23056524
pSPYNE (154) and pUC-SPYCE	semi-quantitative based on measuring fluorescence intensities	combinations with empty vectors	PMID: 23028017
pSPYNE (154) and pUC-SPYCE	fluorescence microscopy, qualitative	combinations with empty vectors	PMID: 23000466
pSPYNE (154) and pUC-SPYCE	fluorescence microscopy, qualitative	combinations with empty vectors	PMID: 22991161
35S-SPYNE(R)173 and 35S-SPYCE(M)	fluorescence microscopy, qualitative	Interaction test with unrelated protein(s)	PMID: 22719257
pSITE–BiFC–nEYFP and pSITE–BiFC–cEYFP	fluorescence microscopy, qualitative	Interaction test for point-mutated or truncated version of protein of interest	PMID: 22645569
pSPYNE (154) and pUC-SPYCE	fluorescence microscopy, qualitative	Interaction test for point-mutated or truncated version of protein of interest	PMID: 22626884
pSP1823-YN or pSP1794-YC	fluorescence microscopy, qualitative	Interaction test for related proteins with similar characteristics/cellular localisation	PMID: 22511869
pSY735 and pSY736	fluorescence microscopy, qualitative	none or not clearly indicated	PMID: 22510066
pSPYNE (154) and pUC-SPYCE	fluorescence microscopy, qualitative	combinations with empty vectors	PMID: 22325871
pNbPCIP1-NYFP (1-154) and pPVX CPCYFP (155-239)	fluorescence microscopy, qualitative	Interaction test for point-mutated or truncated version of protein of interest	PMID: 22166218
pSAT4-nEYFP-C1-B and pSAT4-cEYFP-C1-B	fluorescence microscopy, qualitative	combinations with unfused YFP halves	PMID: 22068106
pSPYNE (154) and pUC-SPYCE	fluorescence microscopy, qualitative	Interaction test for related proteins with similar characteristics/cellular localisation	PMID: 22040291
pSPYNE (154) and pUC-SPYCE	fluorescence microscopy, qualitative	combinations with unfused YFP halves	PMID: 22010978
pSPYNE (154) and pUC-SPYCE	fluorescence microscopy, qualitative	combinations with unfused YFP halves	PMID: 21978157
pSPYNE (154) and pUC-SPYCE	fluorescence microscopy, qualitative	combinations with unfused YFP halves	PMID: 21961694
pEarleyGate201-YC and pEarleyGate202-YN (1-174)	fluorescence microscopy, qualitative	none or not clearly indicated	PMID: 21947026
pSPYNE (154) and pUC-SPYCE	fluorescence microscopy, qualitative	combinations with unfused YFP halves	PMID: 21926091
Split RFP	fluorescence microscopy, qualitative	combinations with unfused YFP halves	PMID: 21914654
nYFP173 and cYFP	fluorescence microscopy, qualitative	combinations with unfused YFP halves	PMID: 21897010
pSPYNE (154) and pUC-SPYCE	fluorescence microscopy, qualitative	combinations with unfused YFP halves	PMID: 21884738
Split RFP	fluorescence microscopy, qualitative	combinations with unfused YFP halves	PMID: 21880839
pSPYNE (154) and pUC-SPYCE	fluorescence microscopy, qualitative	combinations with unfused YFP halves	PMID: 21840354
YN-EE and YC-HA	fluorescence microscopy, qualitative	combinations with unfused YFP halves	PMID: 21811563
pYFN43 and pYFC43	fluorescence microscopy, qualitative	none or not clearly indicated	PMID: 21789193
pBatL-B-sYFP-N and pBatL-B-sYFP-C	fluorescence microscopy, qualitative	Interaction test for point-mutated or truncated version of protein of interest	PMID: 21725861
pBIFP-2 (YFPn1-154) and pBIFP-3	fluorescence microscopy, qualitative	Interaction test with unrelated protein(s)	PMID: 21720953
Split RFP	fluorescence microscopy, qualitative	Interaction test for point-mutated or truncated version of protein of interest	PMID: 21473882
pSPYNE (154) and pUC-SPYCE	fluorescence microscopy, qualitative	combinations with unfused YFP halves	PMID: 21347358
pSPYNE (154) and pUC-SPYCE	fluorescence microscopy, qualitative	Interaction test for point-mutated or truncated version of protein of interest	PMID: 21309870
Split-YFP, vectors not exactly defined	Quantitative based on counting number of positive cells	Interaction test for point-mutated or truncated version of protein of interest	PMID: 21265894
eYFPn (aa 1–172) and eCFPc (aa 154–239)	fluorescence microscopy, qualitative	none or not clearly indicated	PMID: 21175633
pSPYNE (154) and pUC-SPYCE	fluorescence microscopy, qualitative	Interaction test for point-mutated or truncated version of protein of interest	PMID: 21056066
pSPYNE (154) and pUC-SPYCE	quantitative based on measuring fluorescence intensities	Interaction test for related proteins with similar characteristics/cellular localisation	PMID: 20952388
nEYFP (1-174) and cEYFP (175-239)	Quantitative based on counting number of positive cells	Interaction test for related proteins with similar characteristics/cellular localisation	PMID: 20870961
pSAT1-nEYFP-C1 or pSAT4-cEYFP-C1-B	fluorescence microscopy, qualitative	Interaction test for point-mutated or truncated version of protein of interest	PMID: 20566565
pSPYNE (154) and pUC-SPYCE	quantitative based on flow cytometry	Interaction test for point-mutated or truncated version of protein of interest	PMID: 20458611
pSPYNE (154) and pUC-SPYCE	fluorescence microscopy, qualitative	combinations with unfused YFP halves	PMID: 20193958
pA7–NYFP(1-155) and pA7–CYFP(156-239)	fluorescence microscopy, qualitative	combinations with unfused YFP halves	PMID: 20080816
pUC-SPYNE-152, pUCSPYCE	quantitative based on flow cytometry	Interaction test for point-mutated or truncated version of protein of interest	PMID: 19945192
pSPYNE (154) and pUC-SPYCE	fluorescence microscopy, qualitative	none or not clearly indicated	PMID: 19930690
Nt-[YFP](1-155) and Ct-[YFP] (156–238)	fluorescence microscopy, qualitative	combinations with unfused YFP halves	PMID: 19796783
pSPYNE and pYFPC43	fluorescence microscopy, qualitative	Interaction test for point-mutated or truncated version of protein of interest	PMID: 19624469
nEYFP (1-174) and cEYFP (175-239)	fluorescence microscopy, qualitative	transfections with individual vectors	PMID: 19594707
YFPN (1–158) and YFPC (159–239)	fluorescence microscopy, qualitative	combinations with unfused YFP halves	PMID: 19457228 polymerization and cell division at the midpoint of the cell. PMID: 19457228
pSPYNE (154) and pUC-SPYCE	fluorescence microscopy, qualitative	combinations with unfused YFP halves	PMID: 19407339
YN-EE and YC-HA	fluorescence microscopy, qualitative	combinations with unfused YFP halves	PMID: 19392697
pSITE-BiFC (split at AA174)	fluorescence microscopy, qualitative	combinations with unfused YFP halves	PMID: 19309457
pBIFP-2 (YFPn1-154) and pBIFP-3	fluorescence microscopy, qualitative	Interaction test for related proteins with similar characteristics/cellular localisation	PMID: 19258017
pSPYNE (154) and pUC-SPYCE	fluorescence microscopy, qualitative	combinations with unfused YFP halves	PMID: 19220790
pSPYNE (154) and pUC-SPYCE	fluorescence microscopy, qualitative	none or not clearly indicated	PMID: 19105030
pSPYNE (154) and pUC-SPYCE	fluorescence microscopy, qualitative	combinations with unfused YFP halves	PMID: 19054355
pSPYNE (154) and pUC-SPYCE	fluorescence microscopy, qualitative	combinations with unfused YFP halves	PMID: 18982020
CitrineN(1-174) and CitC	fluorescence microscopy, qualitative	combinations with unfused YFP halves	PMID: 18980643	These authors indicate dependence of background levels on promoter stengths!
pSATN BiFC (174)	fluorescence microscopy, qualitative	combinations with unfused YFP halves	PMID: 18811953
pSPYNE (154) and pUC-SPYCE	fluorescence microscopy, qualitative	combinations with unfused YFP halves	PMID: 18804467
pEYFPn 1-174 + pEYFPc	fluorescence microscopy, qualitative	Interaction test for point-mutated or truncated version of protein of interest	PMID: 18467490
pSPYNE (154) and pUC-SPYCE	fluorescence microscopy, qualitative	Interaction test for point-mutated or truncated version of protein of interest	PMID: 18414657
Split-YFP, vectors not exactly defined	fluorescence microscopy, qualitative	Interaction test for point-mutated or truncated version of protein of interest	PMID: 17644730
N-terminal 154 residues (YN) and C-terminal 84 residues (YC) of YFP	fluorescence microscopy, qualitative	combinations with unfused YFP halves	PMID: 17500056
Split-YFP, vectors not exactly defined	fluorescence microscopy, qualitative	Interaction test for point-mutated or truncated version of protein of interest	PMID: 17267444
Split-GFP (1–154)	fluorescence microscopy, qualitative	transfections with individual vectors	PMID: 17021941
YN-EE and YC-HA	fluorescence microscopy, qualitative	none or not clearly indicated	PMID: 17008347
Split-YFP (1-155)	fluorescence microscopy, qualitative	Interaction test with unrelated protein(s)	PMID: 20507457
pSPYNE (154) and pUC-SPYCE	fluorescence microscopy, qualitative	combinations with unfused YFP halves	PMID: 16810321
Split-YFP, vectors not exactly defined	fluorescence microscopy, qualitative	Interaction test for point-mutated or truncated version of protein of interest	PMID: 16690941
1) A classification is made based on the split position. In the majority of studies YFP is used. We distinguished four categories: (I) YFP or GFP split between 7th and 8th β-strands (around AA155); (II) YFP or GFP split between the 8th and 9th β-strands (around AA173); (III) YFP or GFP with no well defined split position; (IV) Split RFP.
2) We classified this into qualitative and quantitative approaches
3) We scored specifically for controls related to the BiFC method (so no confirmations by other methods)
